# Supplementary material for: The impact of molecular stacking interactions on the electronic structure and charge transport properties in distyrylbenzene (DSB-) based D–A complexes: a theoretical study
Source: Royal Society of Chemistry journal article supplement (doi:10.1039/c5ra06497j), 2015-01-01
Supplement: c5ra06497j1.pdf [file c5ra06497j1.pdf]

Supporting Information

## The impact of molecular stacking interactions on the electronic structure and charge transport properties in distyrylbenzene-(DSB) based D-A complexes: a theoretical study

Xi Chen,<sup>a</sup> Fu-Quan Bai,<sup>\*a</sup> Hai-Tao Wang,<sup>b</sup> Hong-Xing Zhang<sup>\*a</sup> and Yongan Tang<sup>c</sup>

<sup>a</sup>Institute of Theoretical Chemistry, Jilin University, Changchun 130023, China. E-mail: [baifq@jlu.edu.cn](mailto:baifq@jlu.edu.cn); [zhanghx@jlu.edu.cn](mailto:zhanghx@jlu.edu.cn).

<sup>b</sup>College of Materials Science and Engineering, Jilin University, Changchun 130012, China.

<sup>c</sup>Department of Chemistry and Biochemistry, Miami University, Oxford, OH 45056

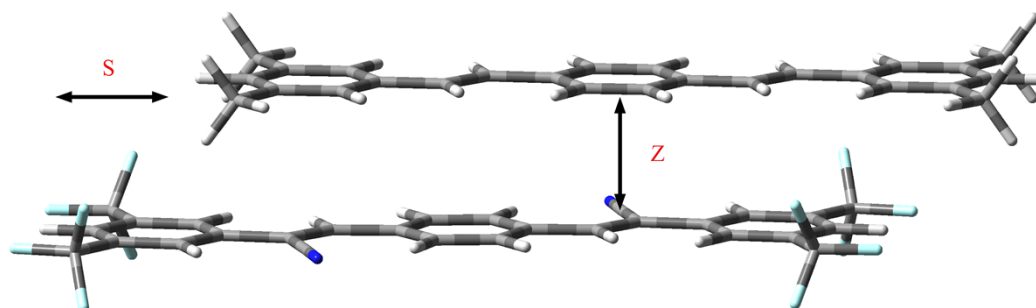

**Fig. S1** Schematic diagram of the displacement patterns in cofacial D-A pair.

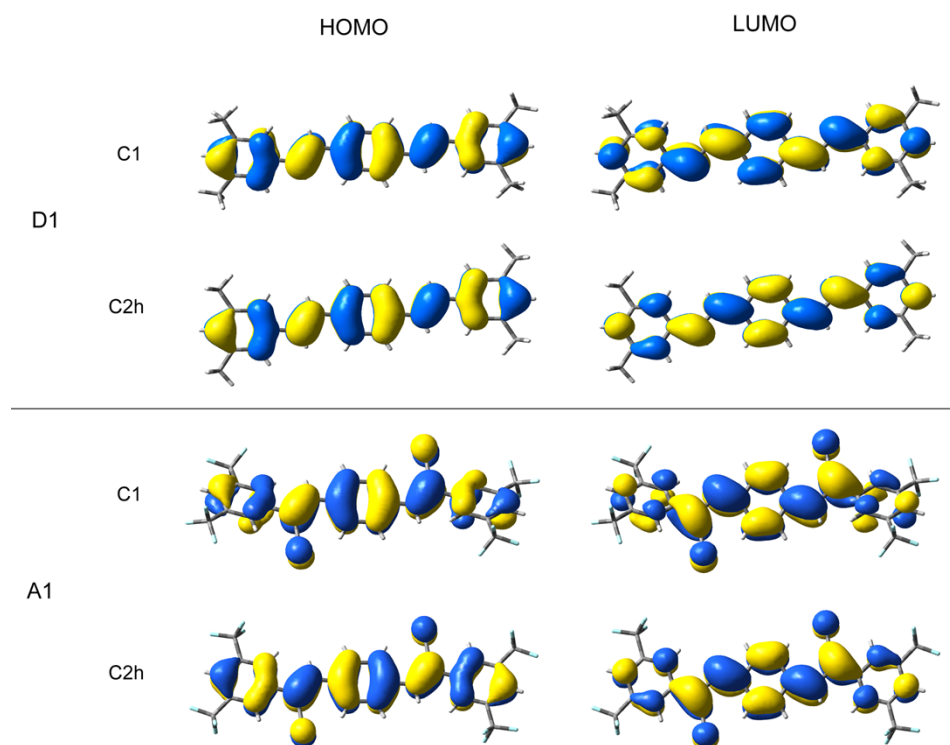

**Fig. S2** HOMOs and LUMOs of D1 and A1 with the  $C_1$  symmetrical structure (ground state) and  $C_{2h}$  symmetrical structure.

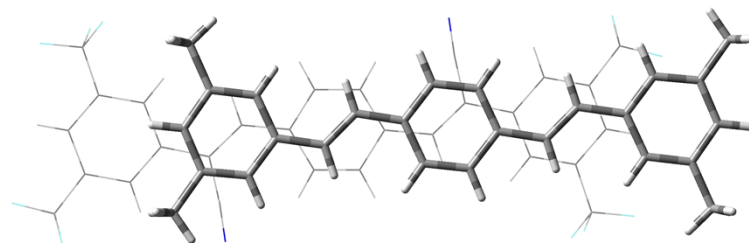

**Fig. S3** Molecular packing crystal structure of top view for D-A complexes in experiment.

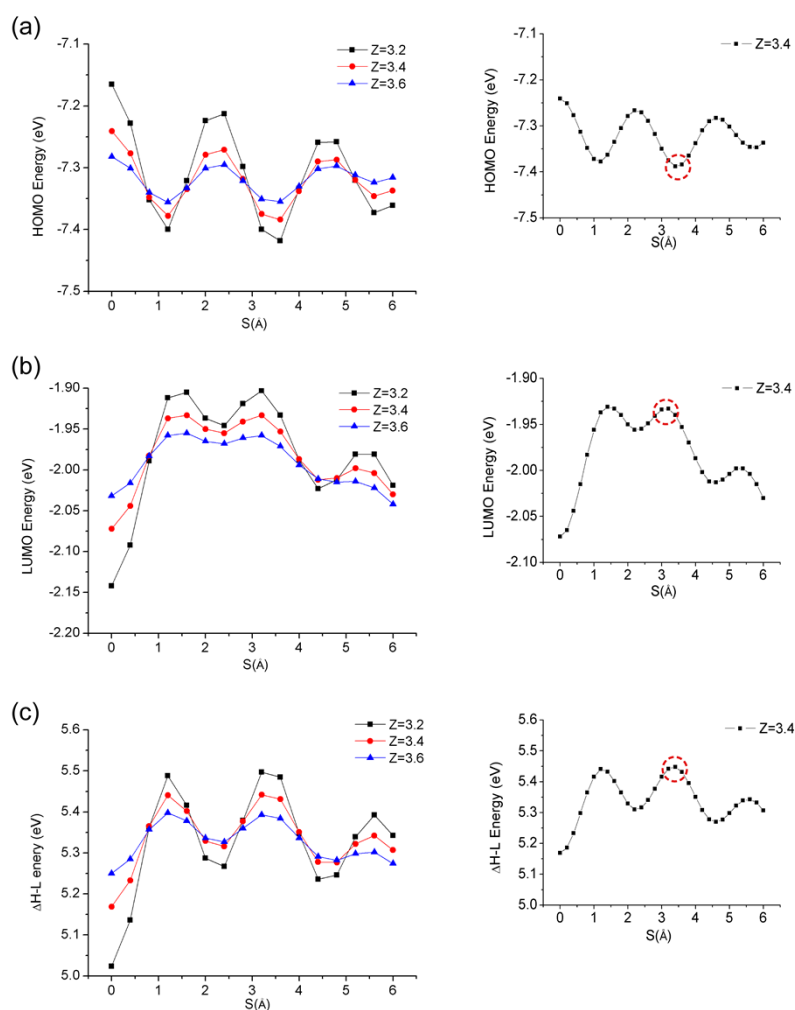

**Fig. S4** Evolution of the HOMO (a), LUMO (b) and HOMO-LUMO gap energy (c) for D1-A1 pair as a function of the horizontal displacement S for the fixed vertical separation Z of 3.2 Å, 3.4 Å and 3.6 Å.

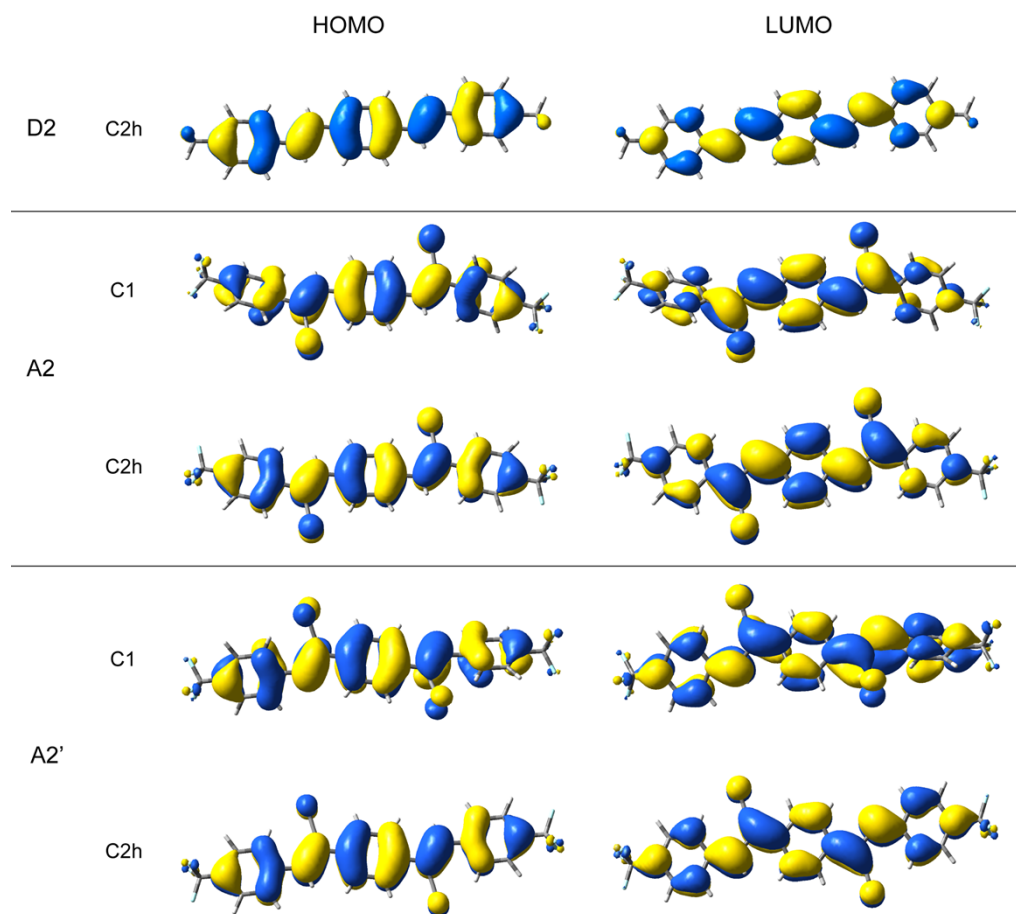

**Fig. S5** HOMOs and LUMOs of D2 and A2 with the C1 symmetrical structure (in ground state) and C2h symmetrical structure.



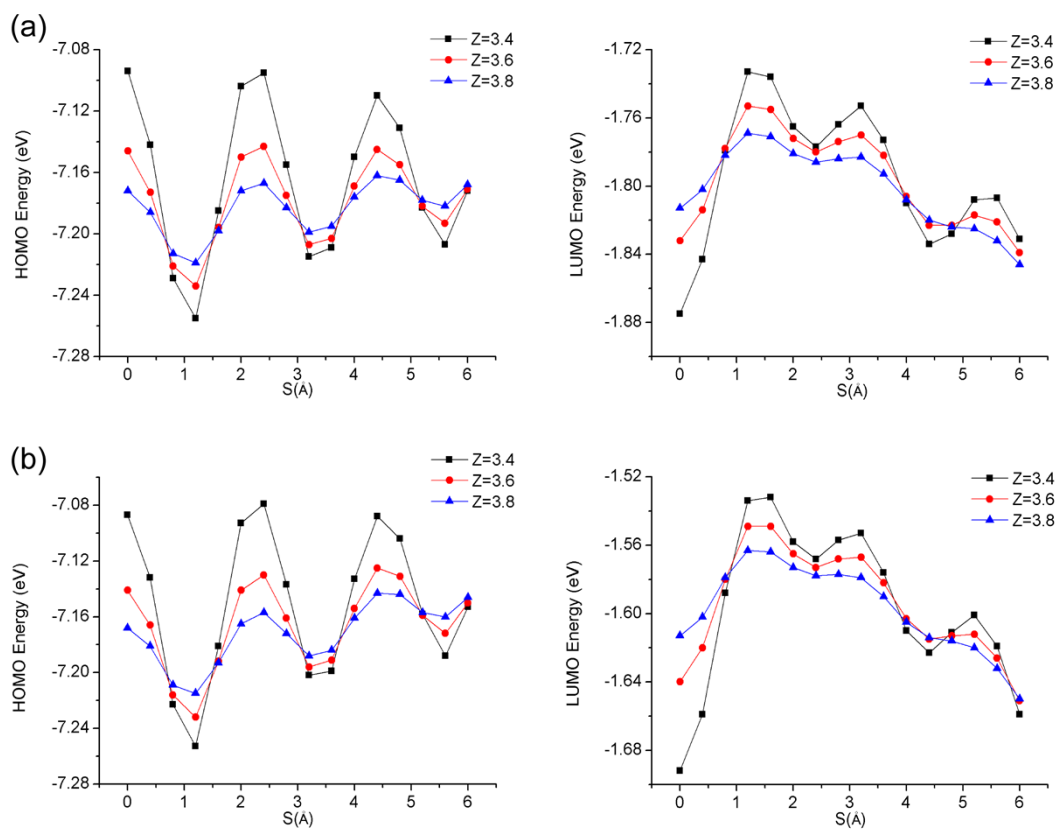

**Fig. S7** Evolution of the HOMO energies and LUMO energies for D2-A2 pair (a) and D2-A2' pair (b) as a function of the horizontal displacement  $S$  for the fixed vertical separation  $Z$  of 3.4 Å, 3.6 Å and 3.8 Å.

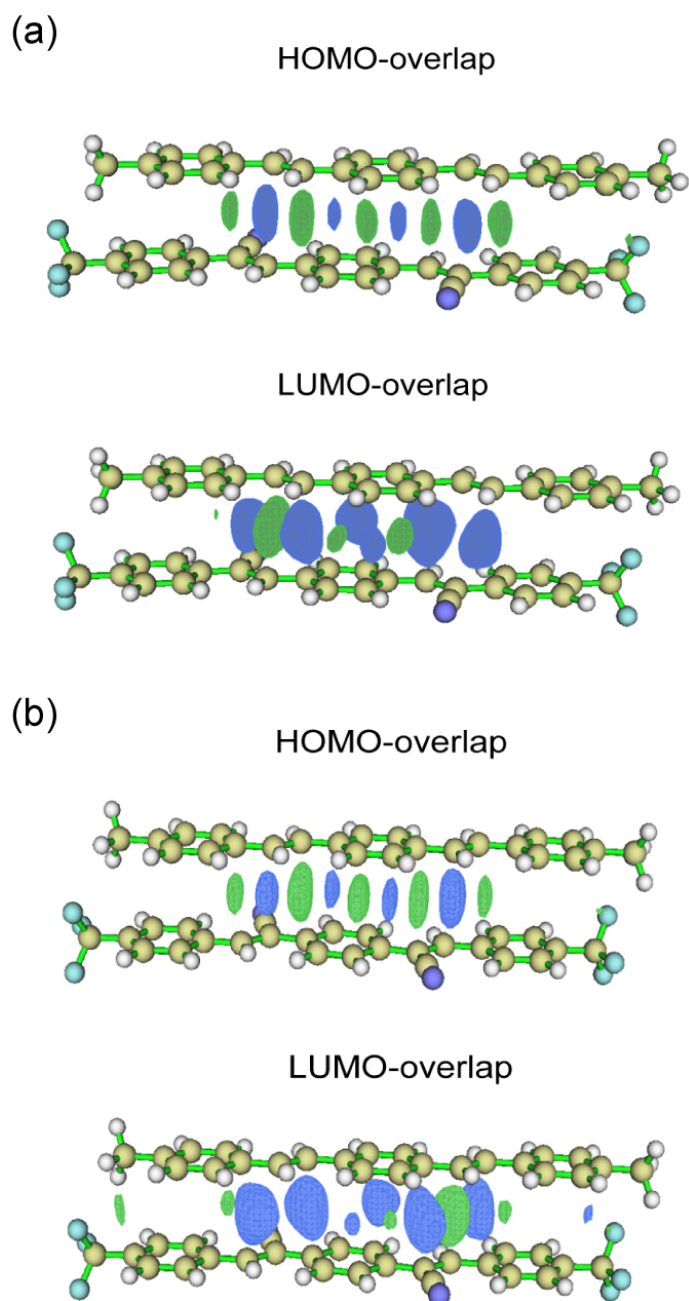

**Fig. S8** The visualization of intermolecular orbital (HOMO and LUMO) overlap between (a) D2 and A2 (b) D2 and A2' molecules. Green/Blue isosurface refers to the overlap in the way of same/opposite phase.

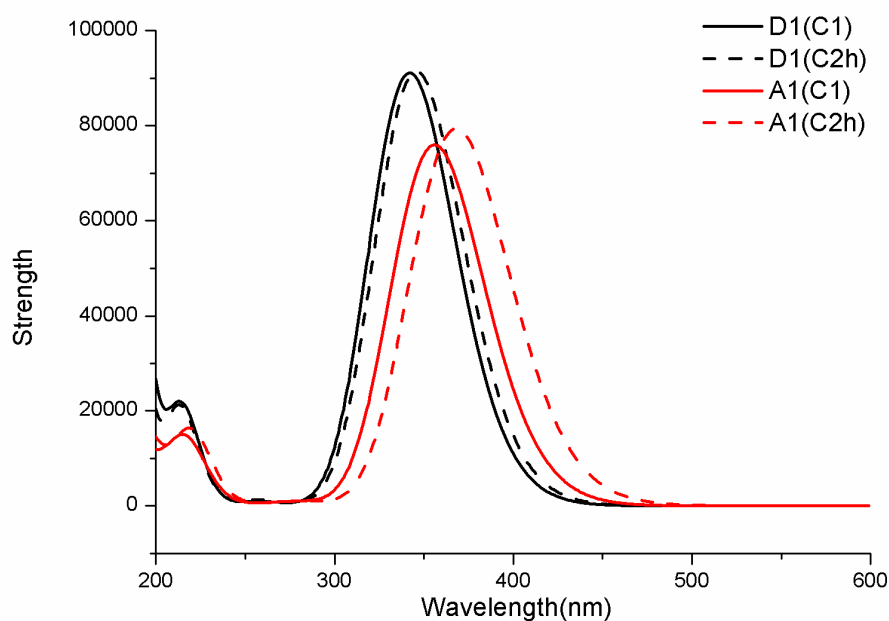

**Fig. S9** Computed UV-vis absorption spectra of D1 and A1 monomers with C1 and C2h geometry, respectively.

**Table S1** Bond lengths (Å), torsion angles ( $^{\circ}$ ), the highest occupied molecular orbital (HOMO) energies (eV), the lowest unoccupied molecular orbital (LUMO) energies (eV) and potential difference ( $\Delta E$ , kcal/mol) in different optimized geometry of **D1** and **A1** and the experimental values.

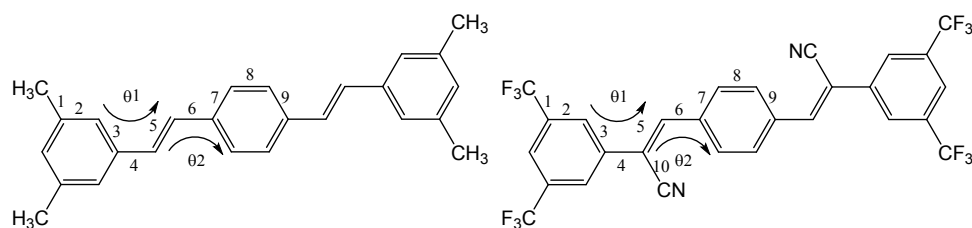

|    | D1                            |                 |       | A1                            |                 |       |
|----|-------------------------------|-----------------|-------|-------------------------------|-----------------|-------|
|    | C <sub>1</sub> (Ground state) | C <sub>2h</sub> | Exp   | C <sub>1</sub> (Ground state) | C <sub>2h</sub> | Exp   |
| 1  | 1.510                         | 1.510           | 1.508 | 1.507                         | 1.508           | 1.496 |
| 2  | 1.389                         | 1.391           | 1.387 | 1.393                         | 1.389           | 1.379 |
| 3  | 1.408                         | 1.406           | 1.403 | 1.399                         | 1.403           | 1.399 |
| 4  | 1.464                         | 1.464           | 1.461 | 1.488                         | 1.489           | 1.473 |
| 5  | 1.347                         | 1.347           | 1.331 | 1.360                         | 1.361           | 1.349 |
| 6  | 1.461                         | 1.461           | 1.461 | 1.456                         | 1.456           | 1.448 |
| 7  | 1.408                         | 1.408           | 1.396 | 1.411                         | 1.412           | 1.400 |
| 8  | 1.385                         | 1.384           | 1.381 | 1.383                         | 1.382           | 1.371 |
| 9  | 1.406                         | 1.406           | 1.398 | 1.409                         | 1.409           | 1.405 |
| 10 |                               |                 |       | 1.429                         | 1.430           | 1.444 |

|            |        |        |      |        |        |      |
|------------|--------|--------|------|--------|--------|------|
| $\theta_1$ | -7.5   | 0.0    | 0.6  | -31.1  | 0.0    | 1.7  |
| $\theta_2$ | -7.4   | 0.0    | -1.3 | -5.6   | 0.0    | -4.7 |
| HOMO       | -5.303 | -5.278 |      | -6.908 | -6.858 |      |
| LUMO       | -1.921 | -1.946 |      | -3.621 | -3.697 |      |
| $\Delta E$ | 0.10   |        |      | 84.37  |        |      |

**Table S2** Bond lengths (Å), torsion angles ( $^\circ$ ), the highest occupied molecular orbital (HOMO) energies (eV), the lowest unoccupied molecular orbital (LUMO) energies (eV) and potential difference ( $\Delta E$ , kcal/mol) in different optimized geometry of D2, A2 and A2'.

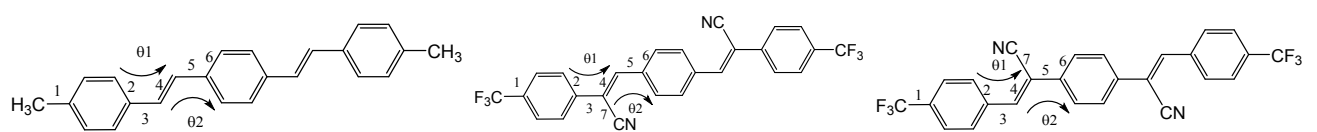

|            | D2                      |  | A2                   |          | A2'                  |          |
|------------|-------------------------|--|----------------------|----------|----------------------|----------|
|            | $C_{2h}$ (Ground state) |  | $C_1$ (Ground state) | $C_{2h}$ | $C_1$ (Ground state) | $C_{2h}$ |
| 1          | 1.508                   |  | 1.504                | 1.504    | 1.505                | 1.505    |
| 2          | 1.408                   |  | 1.404                | 1.406    | 1.409                | 1.411    |
| 3          | 1.463                   |  | 1.487                | 1.488    | 1.460                | 1.460    |
| 4          | 1.347                   |  | 1.360                | 1.361    | 1.359                | 1.360    |
| 5          | 1.461                   |  | 1.456                | 1.456    | 1.485                | 1.486    |
| 6          | 1.408                   |  | 1.411                | 1.410    | 1.403                | 1.406    |
| 7          |                         |  | 1.429                | 1.431    | 1.431                | 1.432    |
| $\theta_1$ | 0.0                     |  | 30.7                 | 0.0      | -8.5                 | 0.0      |
| $\theta_2$ | 0.0                     |  | 6.2                  | 0.0      | -29.5                | 0.0      |
| HOMO       | -5.271                  |  | -6.631               | -6.568   | -6.629               | -6.518   |
| LUMO       | -1.942                  |  | -3.390               | -3.469   | -3.076               | -3.281   |
| $\Delta E$ |                         |  | 1.27                 |          | 1.13                 |          |
